# Supplementary material for: Mechanisms of hydrolysis of phenyl- and benzyl 4-nitrophenyl-sulfamate esters
Source: Royal Society of Chemistry journal article supplement (doi:10.1039/c0ob00362j), 2010-10-25
Supplement: c0ob00362j-a.pdf [file c0ob00362j-a.pdf]

1 **Supplementary information**

2

3 Supplementary Material (ESI) for Organic & Biomolecular Chemistry

4

5 This journal is (c) The Royal Society of Chemistry 2010

6

7 **Mechanisms of hydrolysis of phenyl- and benzyl 4-nitrophenyl- sulfamate**

8 **esters**

9 **William J. Spillane,<sup>\*a</sup> Sergio Thea,<sup>b</sup> Giorgio Cevasco<sup>b,c</sup>, Michael J. Hynes,<sup>a</sup> Cheryl J. A. McCaw<sup>a</sup>**

10 **and Neil P. Maguire<sup>a</sup>**

11

12

13

14

15

16

17

18

19

20

21

22

23

24

25

26

27

28

29

30

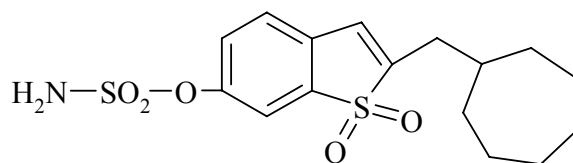

EMD 486019

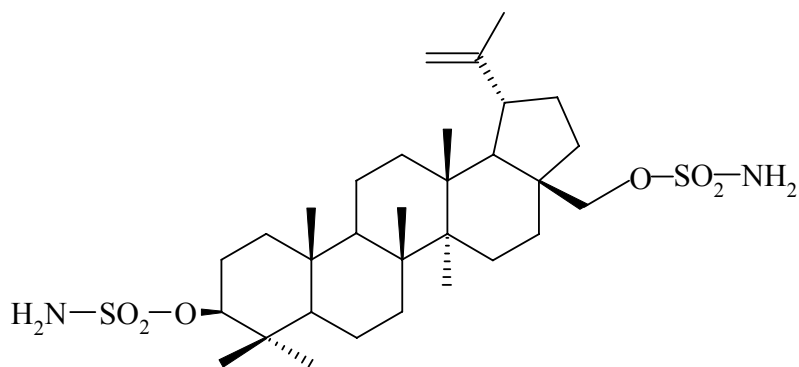

betulinylyl-bis-sulfamate

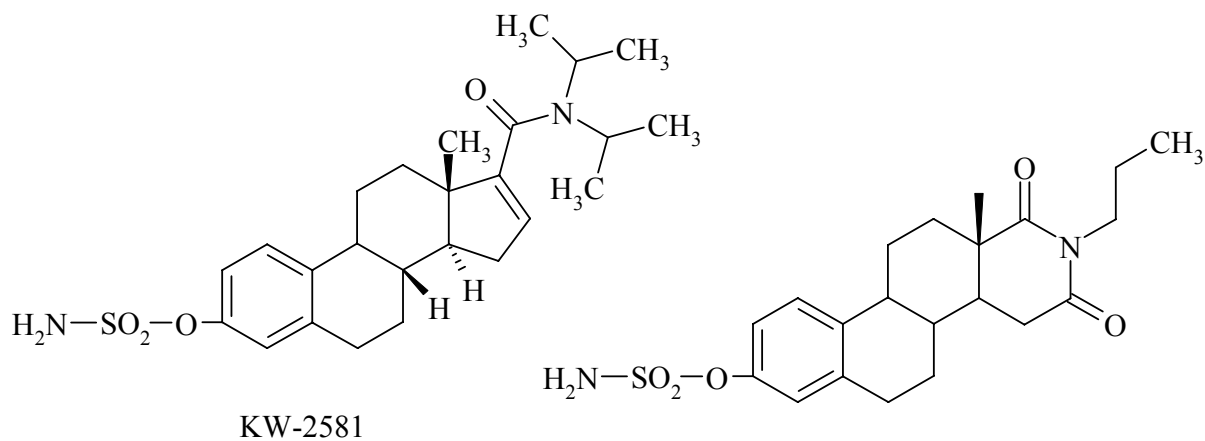

KW-2581

STX-213

31  
32  
33  
34  
35  
36  
37  
38  
39  
40  
41

**Fig. S1** Some newly developed sulfamate-containing inhibitors.

42

43 **Table S1** Experimental<sup>a</sup> pK<sub>a</sub>s for the first ionization<sup>b</sup> of compounds **1**.

| 44 | Compound  | Exper. pK <sub>a</sub> | Anal. λ (nm) | Hammett σ <sup>d</sup> |
|----|-----------|------------------------|--------------|------------------------|
| 45 | <b>1a</b> | 7.32                   | 302          | 0.778                  |
| 46 | <b>1b</b> | 7.40                   | 283          | 0.71                   |
| 47 | <b>1c</b> | 7.45                   | 253          | 0.66                   |
| 48 | <b>1d</b> | 7.50                   | 228          | 0.75                   |
| 49 | <b>1e</b> | 7.66                   | 240          | 0.56                   |
| 50 | <b>1f</b> | 7.88                   | 229          | 0.227                  |
| 51 | <b>1g</b> | 7.92                   | 210          | 0.232                  |
| 52 | <b>1h</b> | 8.15                   | 210          | 0.062                  |
| 53 | <b>1i</b> | 8.24                   | 216          | 0                      |
| 54 | <b>1j</b> | 8.34                   | 222          | -0.17                  |

55 <sup>a</sup>Measured in water at 25°C. <sup>b</sup>**1**–**2**. <sup>d</sup>Taken from D. H. McDaniel and H. C. Brown,  
56 *J. Org. Chem.*, 1958, **23**, 420-427.

57

58

59

60 **Table S2** Experimental<sup>a</sup> pK<sub>a</sub>s for the second ionization<sup>b</sup> of compounds **1** in ACN

61

| 62 | Compound  | Exper. pK <sub>a</sub> | Hammett σ <sup>c</sup> | Compound  | Exper. pK <sub>a</sub> | Hammett σ <sup>c</sup> |
|----|-----------|------------------------|------------------------|-----------|------------------------|------------------------|
| 64 | <b>1a</b> | 21.38                  | 0.778                  | <b>1h</b> | 22.69                  | 0.062                  |
| 65 | <b>1f</b> | 22.48                  | 0.227                  | <b>1i</b> | 22.41                  | 0                      |
| 66 | <b>1g</b> | 22.35                  | 0.232                  | <b>1j</b> | 22.71                  | -0.17                  |

67 <sup>a</sup> Measured at λ = 340 nm in ACN at 25°C using 4-nitrophenoxide as indicator. <sup>b</sup>**2**–**3**.

68 <sup>c</sup>Taken from D. H. McDaniel and H. C. Brown, *J. Org. Chem.*, 1958, **23**, 420-427.

69

70

71 **Table S3** Spectrophotometric<sup>a</sup> and kinetic<sup>b</sup> pK<sub>a</sub>s for the ionization<sup>c</sup> of compounds **4a-**  
 72 **g**

| 73 | Compound  | pK <sub>a</sub> <sup>spectr</sup> | pK <sub>a</sub> <sup>kin</sup> | Hammett σ <sup>d</sup> |
|----|-----------|-----------------------------------|--------------------------------|------------------------|
| 74 | <b>4a</b> | 7.83                              | 7.75                           | 0.73 <sup>e</sup>      |
| 75 | <b>4b</b> | 8.11                              | 7.79                           | 0.227                  |
| 76 | <b>4c</b> | 7.89                              | 7.80                           | 0.50 <sup>e</sup>      |
| 77 | <b>4d</b> | 8.04                              | 7.91                           | 0.062                  |
| 78 | <b>4e</b> | 8.26                              | 8.01                           | 0                      |
| 79 | <b>4f</b> | 8.22                              | 8.07                           | -0.17                  |
| 80 | <b>4g</b> | 8.26                              | 8.12                           | -0.27                  |

81 <sup>a</sup>Measured spectrophotometrically in water at 25°C at constant ionic strength(μ)=1.0  
 82 M KCl. Analytical wavelength was 302 nm for all substrates. <sup>b</sup>Calculated by fitting  
 83 the pH-rate profile data to eqn 1 with the Fig.P<sup>®</sup> program. <sup>c</sup>4↔5. <sup>d</sup>Taken from D. H.  
 84 McDaniel and H. C. Brown, *J. Org. Chem.*, 1958, **23**, 420-427. <sup>e</sup>The σ value for 2-  
 85 chloro is from M. T. Tribble and J. G. Traynham, *J. Am. Chem. Soc.*, 1969, **91**, 379-  
 86 388.

87

88

89 **Table S4** pH-Rate profile data<sup>a,b</sup> for the hydrolysis of compound **4a** in water at 25°C

| 90 | pH   | - logk <sub>obs</sub> /s | pH   | - logk <sub>obs</sub> /s |
|----|------|--------------------------|------|--------------------------|
| 91 | 6.37 | 3.98                     | 9.95 | 2.58                     |
| 92 | 7.10 | 3.29                     | 10.8 | 2.58                     |
| 93 | 7.62 | 2.93                     | 12.0 | 2.55                     |
| 94 | 8.15 | 2.71                     | 13.0 | 2.56                     |
| 95 | 8.47 | 2.65                     | 14.0 | 2.47                     |
| 96 | 9.14 | 2.68                     |      |                          |

97 <sup>a</sup>Measured spectrophotometrically in water at 25°C at (μ)=1.0 M KCl. Analytical  
 98 wavelength was 400 nm. <sup>b</sup> The following buffers were used to control pH in the  
 99 ranges shown: pH from 6.37-7.62 phosphate (0.005 – 0.1 M); pH 8.15-9.14 borate  
 100 (0.01 – 0.2 M; pH 9.95-10.8 carbonate (0.05 – 0.2 M) and pH 12-14 hydroxide (0.01  
 101 – 1 M).

102

103

104

105

106 **Table S5** pH-Rate profile data<sup>a</sup> for the hydrolysis of compound **1a** in water at 50°C.

| 107 | H <sub>0</sub> /pH | -logk <sub>obs</sub> /s | H <sub>0</sub> /pH | -logk <sub>obs</sub> /s |
|-----|--------------------|-------------------------|--------------------|-------------------------|
| 108 | -1.05              | 3.87 <sup>b</sup>       | 5.00               | 3.37 <sup>c,d</sup>     |
| 109 | -0.83              | 3.83 <sup>b</sup>       | 5.47               | 3.01 <sup>c,d</sup>     |
| 110 | -0.69              | 3.82 <sup>b</sup>       | 6.05               | 2.64 <sup>c,d</sup>     |
| 111 | -0.44              | 3.79 <sup>b</sup>       | 6.59               | 2.00 <sup>c,d</sup>     |
| 112 | 0                  | 3.79 <sup>c</sup>       | 6.71               | 1.91 <sup>c,d</sup>     |
| 113 | 0.3                | 3.76 <sup>c</sup>       | 7.14               | 1.60 <sup>c,d</sup>     |
| 114 | 0.8                | 3.71 <sup>c</sup>       | 7.30               | 1.59 <sup>c,d</sup>     |
| 115 | 1.0                | 3.65 <sup>c</sup>       | 7.80               | 1.41 <sup>c,d</sup>     |
| 116 | 2.33               | 3.54 <sup>c</sup>       | 8.60               | 0.83 <sup>c,d</sup>     |
| 117 | 3.8                | 3.49 <sup>c,d</sup>     | 8.78               | 0.72 <sup>c,d</sup>     |

118 <sup>a</sup>Conditions: Substrate concentration was 1 x 10<sup>-4</sup>M. Runs were followed by the  
119 production of 4-nitrophenol at 265 nm or 4-nitrophenoxide at 410 nm and were  
120 carried out for at least 4 half-lives and done in triplicate. Runs were generally  
121 reproducible to within ± 5% except those at pHs 7.8, 8.6 and 8.78 which were  
122 reproducible to within ± 9%. <sup>b</sup>Constant ionic strength (μ)=3.0 M KCl. <sup>c</sup>(μ)=1.0 M  
123 KCl. <sup>d</sup>Carried out using 0.01 M TRIS-cacodylate buffer.

124

125

126

127

128

129 **Table S6** Logk<sub>obs</sub> for the hydrolysis<sup>a</sup> of compounds **1a** and **1f-j** in water at 50°C at  
130 pH = 2.0, the pK<sub>a</sub> of the leaving phenols<sup>b</sup> and literature Hammett σ value<sup>c</sup>

| 131 | Compound  | -logk <sub>obs</sub> /s | Anal. λ (nm) | pK <sub>a</sub> | Hammett σ |
|-----|-----------|-------------------------|--------------|-----------------|-----------|
| 132 | <b>1a</b> | 3.60                    | 325          | 7.15            | 0.778     |
| 133 | <b>1f</b> | 4.50                    | 290          | 9.41            | 0.232     |
| 134 | <b>1g</b> | 4.46                    | 275          | 9.37            | 0.227     |
| 135 | <b>1h</b> | 4.78                    | 280          | 9.89            | 0.062     |
| 136 | <b>1i</b> | 4.69                    | 275          | 9.99            | 0         |

137 **1j** 4.90 280 10.26 -0.17

138 <sup>a</sup>At  $\mu=1.0$  M KCl. <sup>b</sup>In water at 25°C. Values were taken from A. Albert and E. P.  
139 Serjeant, *The Determination of Ionization Constants*, third ed., Chapman and Hall,  
140 London, 1984, p.145. <sup>c</sup>Taken from D. H. McDaniel and H. C. Brown, *J. Org. Chem.*,  
141 1958, **23**, 420-427.

142

143

144 **Table S7** Hydrolysis of compound **1a** in aqueous organic solvent mixtures<sup>a</sup> of  
145 identical ionizing power ( $Y_{OTs}$ ) but differing nucleophilicities ( $N_{OTs}$ ).

| 146 Solvent system | $N_{OTs}$                                                               | $Y_{OTs}$ | $\log k_{obs}/s$ | Rate ratio      |
|--------------------|-------------------------------------------------------------------------|-----------|------------------|-----------------|
| 147                | $k_{\text{solvent mixture}}/k_{97\% \text{ TFE or } 97\% \text{ HFIP}}$ |           |                  |                 |
| 148 44.8% EtOH     | -0.19                                                                   | 1.83      | -3.39            | 95 <sup>b</sup> |
| 149 52.4% MeOH     | -0.17                                                                   | 1.83      | -3.45            | 84 <sup>b</sup> |
| 150 36% ACN        | -1.16                                                                   | 1.83      | -3.52            | 71 <sup>b</sup> |
| 151 97% TFE        | -3.25                                                                   | 1.83      | -5.37            | -               |
| 152 10% EtOH       | -0.41                                                                   | 3.78      | -3.46            | 22 <sup>c</sup> |
| 153 10% MeOH       | -0.41                                                                   | 3.78      | -3.47            | 21 <sup>c</sup> |
| 154 10% ACN        | -1.29                                                                   | 3.60      | -3.47            | 21 <sup>c</sup> |
| 155 97% HFIP       | -4.27                                                                   | 3.60      | -4.79            | -               |

156 <sup>a</sup>At 50 °C using v/v mixtures except for 97% TFE and 97% HFIP which were w/w.

157 <sup>b</sup>Compared with the rate in 97% TFE. <sup>c</sup>Compared with the rate in 97%HFIP.

158

159

160 **Table S8**  $\log k_{obs}$  for the hydrolysis of **1a** in 50% aqueous ACN at 25°C at high pH.

161

| 162 pH   | $\log k_{obs}/s$ | Anal. $\lambda$ nm | pH   | $\log k_{obs}/s$ | Anal. $\lambda$ nm |
|----------|------------------|--------------------|------|------------------|--------------------|
| 164 8.7  | -4.71            | 325 <sup>a</sup>   | 11.7 | 0.921            | 400 <sup>b,c</sup> |
| 165 9.7  | -4.46            | 400 <sup>b</sup>   | 12.7 | 2.068            | 400 <sup>b,c</sup> |
| 166 10.7 | -1.67            | 400 <sup>b</sup>   |      |                  |                    |

167 <sup>a</sup>Appearance of 4-nitrophenol. <sup>b</sup>Appearance of 4-nitrophenoxide. <sup>c</sup>Rates determined  
168 using stopped-flow apparatus.

169

170 **Table S9** Log $k_{\text{obs}}$  for the hydrolysis of compounds **1a** and **1g-j** at pH = 11.7 at 25°C  
171 in 50% aqueous ACN, the pK $_a$  of the leaving phenols and literature Hammett  $\sigma$   
172 values.

| 173 | Compound  | log $k_{\text{obs}}$ /s | Anal. $\lambda$ (nm) | pK $_a$ | Hammett $\sigma$ |
|-----|-----------|-------------------------|----------------------|---------|------------------|
| 174 | <b>1a</b> | 0.921                   | 325                  | 7.15    | 0.778            |
| 175 | <b>1g</b> | -2.39                   | 275                  | 9.37    | 0.232            |
| 176 | <b>1h</b> | -3.47                   | 280                  | 9.89    | 0.062            |
| 177 | <b>1i</b> | -3.52                   | 275                  | 9.99    | 0                |
| 178 | <b>1j</b> | -4.26                   | 280                  | 10.26   | -0.17            |

179 <sup>a</sup>In water at 25°C. Values were taken from A. Albert and E. P. Serjeant, *The*  
180 *Determination of Ionization Constants*, 3rd ed., Chapman and Hall, London, 1984,  
181 p.145. <sup>b</sup>Taken from D. H. McDaniel and H. C. Brown, *J. Org. Chem.*, 1958, **23**, 420-  
182 427.

183

184

185

186

187 **Table S10** Log $k_a$  for the hydrolysis of compounds **4a-g** in water<sup>a</sup> at 25°C and  
188 Hammett  $\sigma$  values<sup>b</sup>

| 189 | Compound  | -log $k_a$ /s | Hammett $\sigma$  |
|-----|-----------|---------------|-------------------|
| 190 | <b>4a</b> | 2.57          | 0.73 <sup>c</sup> |
| 191 | <b>4b</b> | 2.46          | 0.227             |
| 192 | <b>4c</b> | 2.56          | 0.50 <sup>c</sup> |
| 193 | <b>4d</b> | 2.43          | 0.062             |
| 194 | <b>4e</b> | 2.40          | 0                 |
| 195 | <b>4f</b> | 2.33          | -0.17             |
| 196 | <b>4g</b> | 2.33          | -0.27             |

197 <sup>a</sup> $\mu$  = 1.0 M (KCl). Analytical wavelength was 400 nm for each substrate. <sup>b</sup>See Table  
198 S3, footnote d. <sup>c</sup>The  $\sigma$  value for 2-chloro is from M. T. Tribble and J. G. Traynham,  
199 *J. Am. Chem. Soc.*, 1969, **91**, 379-388.

200

201

202

203

204 **Table S11** pH-rate profile data for the hydrolysis of compounds **4b–g**.<sup>a</sup>

| Compound | <b>4b</b>                | <b>4c</b> | <b>4d</b> | <b>4e</b> | <b>4f</b> | <b>4g</b> |
|----------|--------------------------|-----------|-----------|-----------|-----------|-----------|
| pH       | - logk <sub>obs</sub> /s |           |           |           |           |           |
| 6.37     | 3.82                     | 3.82      | 3.96      | 3.92      | 3.96      | 4.03      |
| 7.10     | 3.27                     | 3.38      | 3.31      | 3.44      | 3.39      | 3.40      |
| 7.62     | 2.91                     | 2.99      | 2.92      | 2.95      | 2.96      | 2.97      |
| 8.15     | 2.65                     | 2.74      | 2.65      | 2.66      | 2.63      | 2.64      |
| 8.47     | 2.55                     | 2.65      | 2.54      | 2.54      | 2.48      | 2.50      |
| 9.14     | 2.47                     | 2.59      | 2.45      | 2.43      | 2.37      | 2.35      |
| 9.95     | 2.45                     | 2.55      | 2.42      | 2.40      | 2.32      | 2.32      |
| 10.77    | 2.47                     | 2.57      | 2.44      | 2.41      | 2.34      | 2.35      |
| 12.0     | 2.45                     | 2.54      | 2.42      | 2.38      | 2.31      | 2.30      |
| 13.0     | 2.42                     | 2.52      | 2.41      | 2.37      | 2.31      | 2.30      |
| 14.0     | 2.33                     | 2.44      | 2.33      | 2.29      | 2.23      | 2.19      |

205 <sup>a</sup>Conditions are the same as those reported in Table 2 for compound **4a**.

206

207

208 **Table S12** Effect of acetate buffer on the hydrolysis of **1a** in water at 25°C

209

| Buffer  | Buffer conc. (M) | pH   | 10 <sup>5</sup> k <sub>obs</sub> /s |
|---------|------------------|------|-------------------------------------|
| Acetate | 0.09             | 4.63 | 1.21                                |
| Acetate | 0.018            | 4.65 | 1.28                                |
| Acetate | 0.036            | 4.65 | 1.27                                |

215

216

217

218 **Table S13** Physical and analytical data for compounds **4a–g**

219

| Compound  | m.p. (°C) | Calculated (%) |      |      | Found (%) |      |      |
|-----------|-----------|----------------|------|------|-----------|------|------|
|           |           | C              | H    | N    | C         | H    | N    |
| <b>4a</b> | 111 – 112 | 41.35          | 2.67 | 7.43 | 41.61     | 2.78 | 7.36 |



Supplementary Material (ESI) for Organic & Biomolecular Chemistry  
This journal is (c) The Royal Society of Chemistry 2010

---

|           |           |       |      |      |       |      |      |
|-----------|-----------|-------|------|------|-------|------|------|
| <b>4b</b> | 106 – 107 | 45.56 | 3.23 | 8.17 | 45.79 | 3.21 | 8.28 |
| <b>4c</b> | 84 – 85   | 45.56 | 3.23 | 8.17 | 45.56 | 3.21 | 8.08 |
| <b>4d</b> | 100 – 101 | 47.85 | 3.40 | 8.56 | 48.02 | 3.42 | 8.68 |
| <b>4e</b> | 109 – 110 | 50.64 | 3.92 | 9.09 | 50.81 | 3.87 | 9.10 |
| <b>4f</b> | 113 – 114 | 52.17 | 4.38 | 8.69 | 52.58 | 4.54 | 8.75 |
| <b>4g</b> | 103 - 104 | 49.70 | 4.17 | 8.30 | 50.64 | 4.22 | 8.25 |

---
